# Supplementary material for: Changes in psychosocial distress and the number and types of problems reported by patients with cancer when routine screening is integrated within cancer services
Source: Research Square preprint supplement (doi:10.21203/rs.3.rs-2298952/v1), 2022-11-29

**Article name:** Changes in psychosocial distress and the number and types of problems reported by patients with cancer when routine screening is integrated within cancer services

**Journal name:** Supportive Care in Cancer

**Authors:** MM Faris, HL Shepherd, PN Butow, P Kelly, S He, P Grimison, B Kelly, The ADAPT Program Group, JM Shaw

**Affiliation and email address of corresponding author:**

Associate Professor Joanne M Shaw

Psycho-Oncology Co-operative Research Group (PoCoG), School of Psychology, University of Sydney, Sydney, NSW, 2006 Australia

[joanne.shaw@sydney.edu.au](mailto:joanne.shaw@sydney.edu.au)

## CONSORT 2010 Flow Diagram

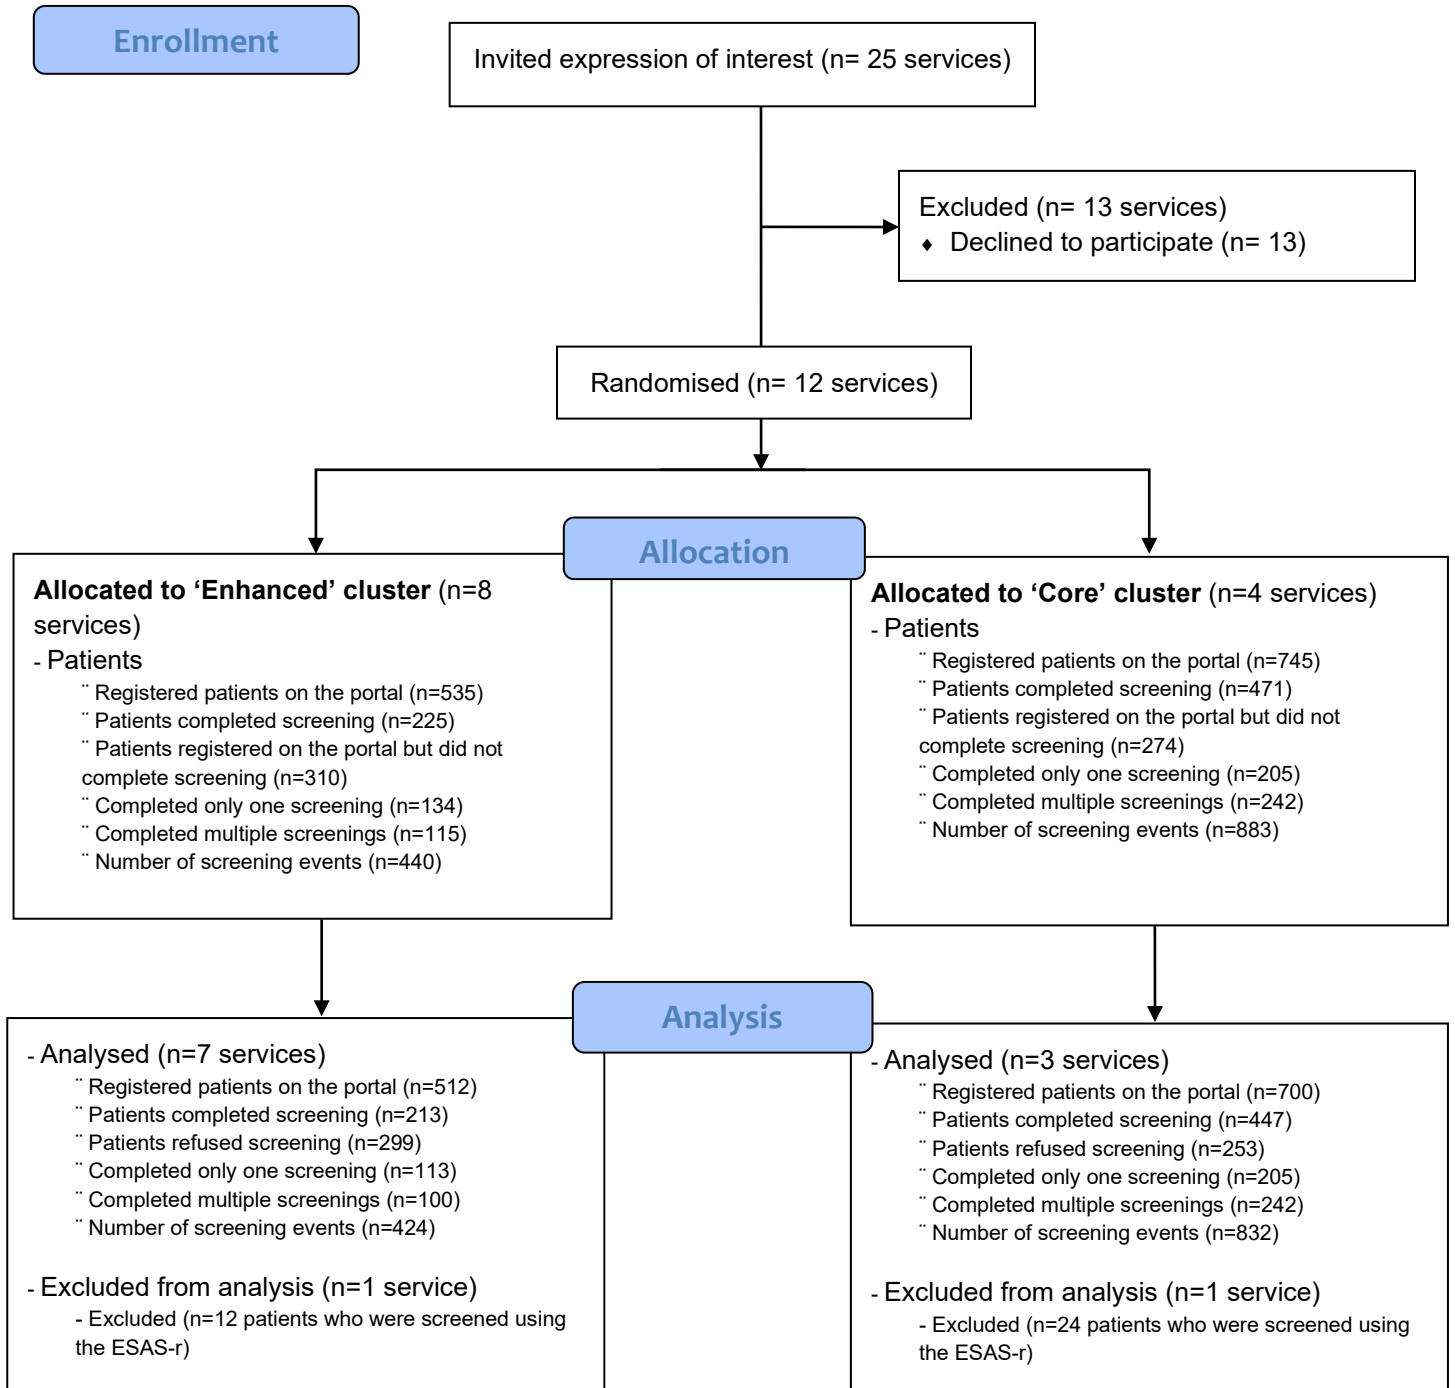

Supplement: Supplementary file 2 [file ca21870560391f51791f1969.pdf]
